# Supplementary material for: Structural defects on converted bismuth oxide nanotubes enable highly active electrocatalysis of carbon dioxide reduction
Source: PubMed Central journal article supplement (PMC6594929; doi:10.1038/s41467-019-10819-4), 2019-06-26
Supplement: 41467_2019_10819_MOESM1_ESM.pdf [file 41467_2019_10819_MOESM1_ESM.pdf]

# **Supplementary Information**

**Structural defects on converted bismuth oxide nanotubes enable highly active electrocatalysis of carbon dioxide reduction**

Gong *et al.*

## 1. Supplementary Figures

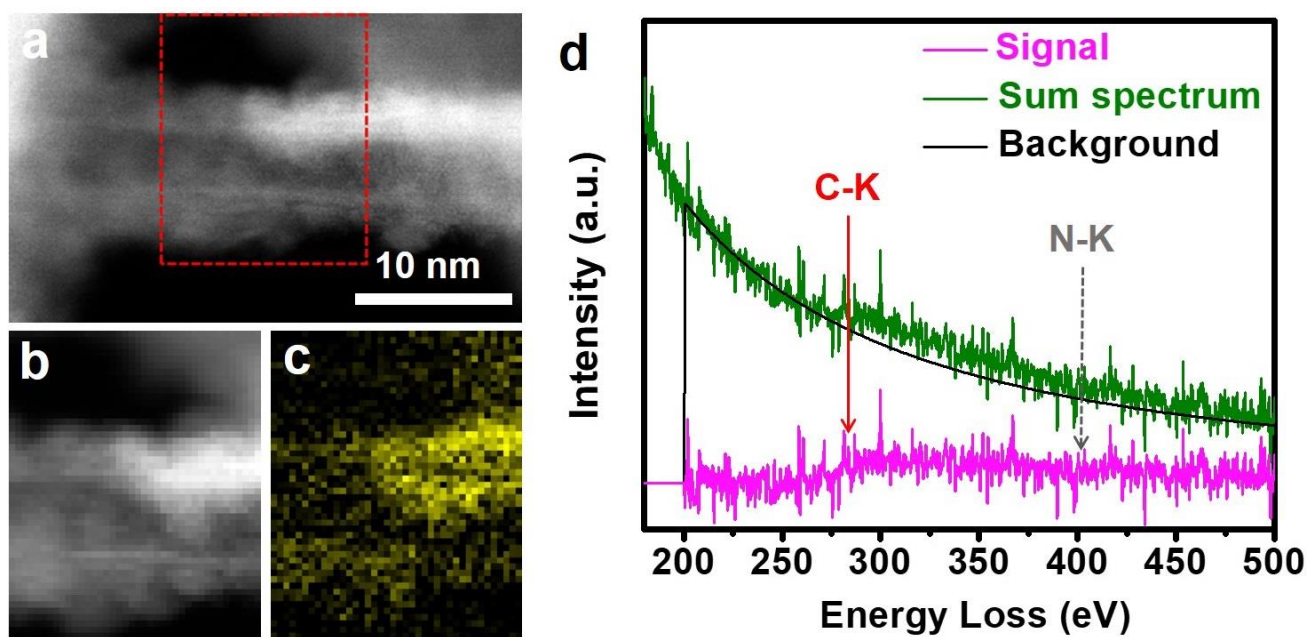

**Supplementary Figure 1.** (a) STEM-HAADF imaging of a  $\text{Bi}_2\text{O}_3$  NT; the red dotted rectangle shows where the EELS mapping was acquired. (b) ADF image and (c) C-K edge mapping of the enclosed region in (a). (d) EELS spectrum in the C-K and N-K range.

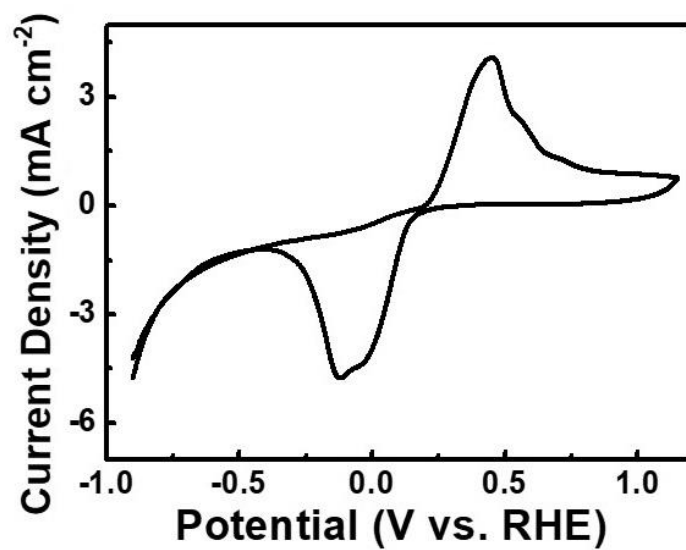

**Supplementary Figure 2.** CV curve of Bi<sub>2</sub>O<sub>3</sub> NTs in N<sub>2</sub>-saturated 0.5 M KHCO<sub>3</sub> showing the redox peaks assignable to the interconversion between Bi<sup>3+</sup> and Bi<sup>0</sup>.

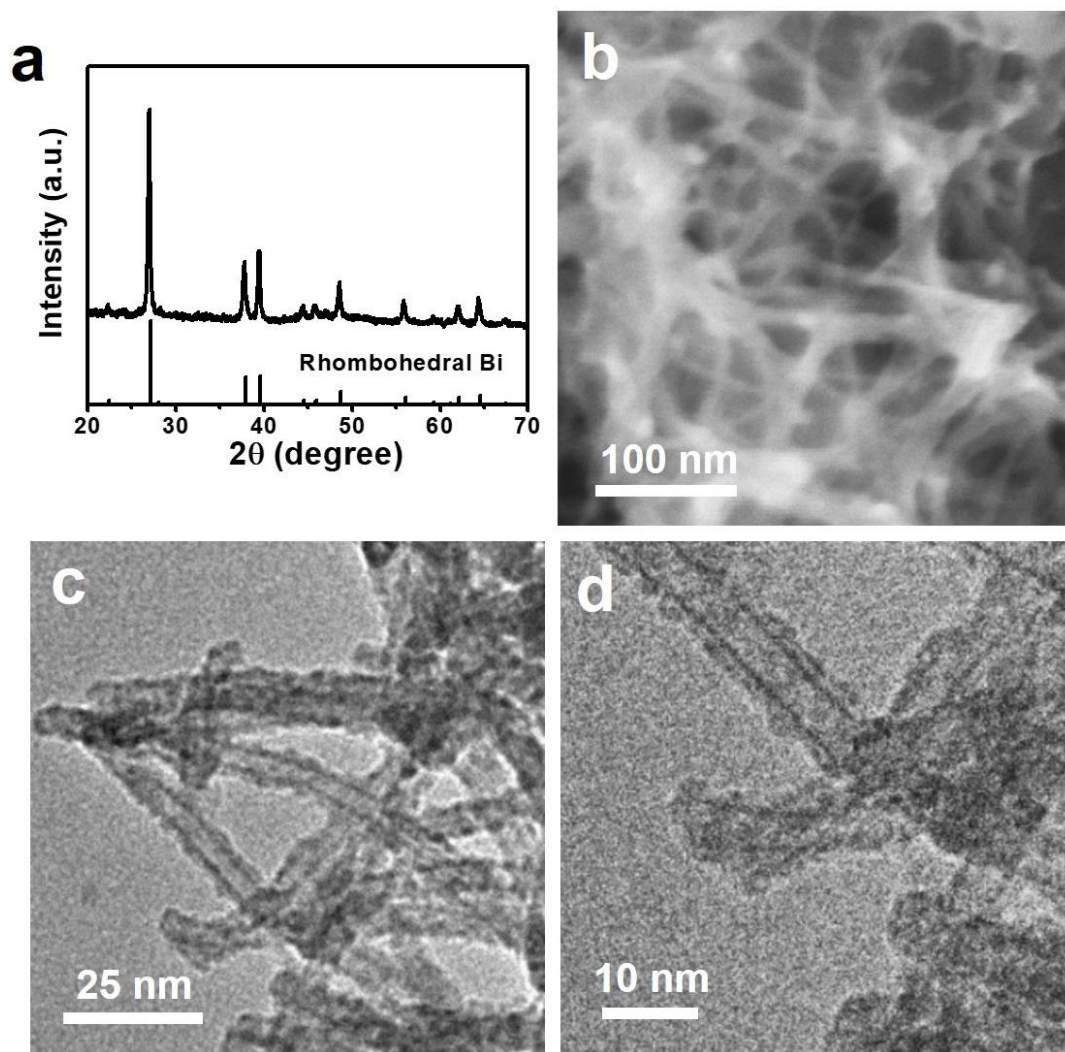

**Supplementary Figure 3.** (a) XRD pattern, (b) SEM image and (c,d) TEM images of NTD-Bi from the cathodic conversion of  $\text{Bi}_2\text{O}_3$  NTs.

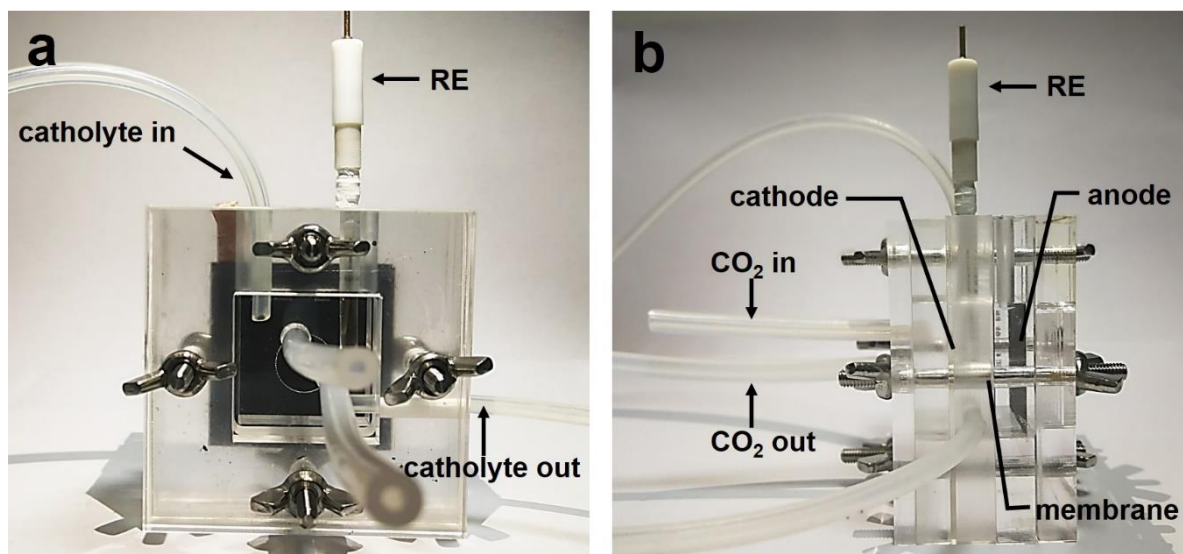

**Supplementary Figure 4.** Photos of our flow cell reactor viewed from (a) the front and (b) the side.

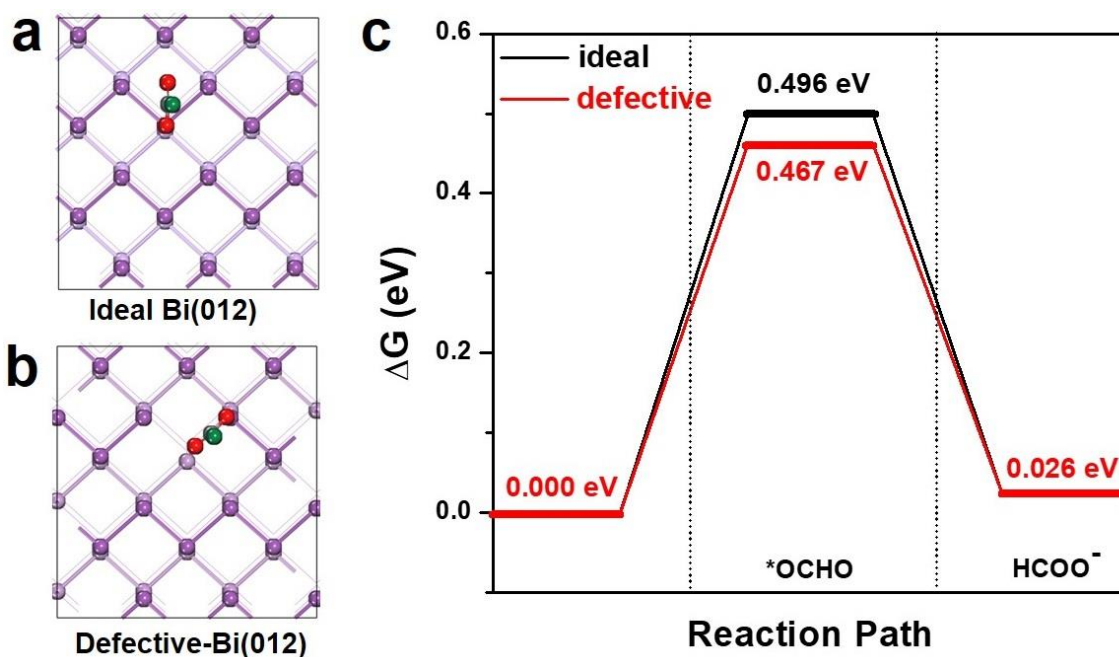

**Supplementary Figure 5.** Optimized geometry of \*OCHO adsorption on (a) ideal and (b) defective Bi(012) planes; the dark purple atoms represent top layer Bi atoms, and the light purple represent Bi atoms in second layer. (c) Energy profile of the CO<sub>2</sub> reduction to HCOO<sup>-</sup> on ideal and defective Bi(012) surfaces.

Here, (012) plane was selected as the second example for DFT calculation because it has the most intense diffraction peak in the X-ray diffraction pattern (XRD) of Bi metal. On the ideal (012) plane, each Bi atom is connected with two equidistant nearest neighbor atoms in the same layer and one next nearest Bi in adjacent layer, forming a step like structure. DFT calculations show that the \*OCHO intermediate prefers to be adsorbed on the top site of Bi (Figure S5a). Its formation energy is +0.496 eV. To create structural defects, we remove one Bi atom from the top layer, break the initial wavelike structure and leave two coordinate unsaturated Bi atoms as active centers (Figure S5b). It is found that these two-fold coordinated Bi atoms stabilize \*OCHO with  $\Delta G = +0.467$  eV (Figure S5c). This trend is generally consistent with our observation on Bi(001) that the presence of defects stabilize the key reaction intermediate and thereby enhance the reaction activity.

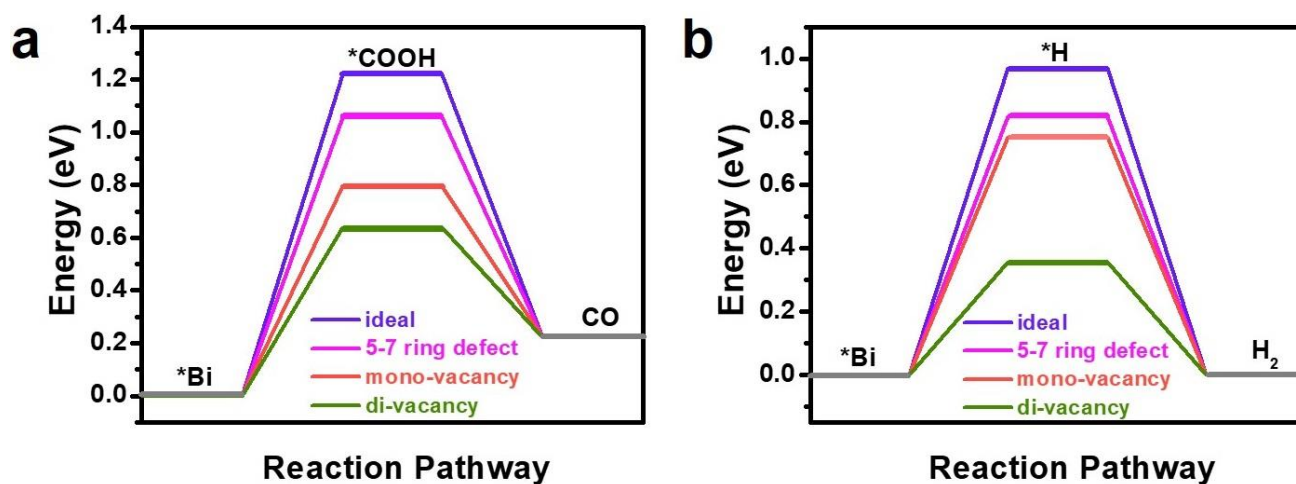

**Supplementary Figure 6.** Energy profile for (a) CO<sub>2</sub> reduction to CO (with \*COOH as the reaction intermediate) and (b) hydrogen evolution reaction (with \*H as the reaction intermediate) on ideal and defective Bi(001) surfaces.

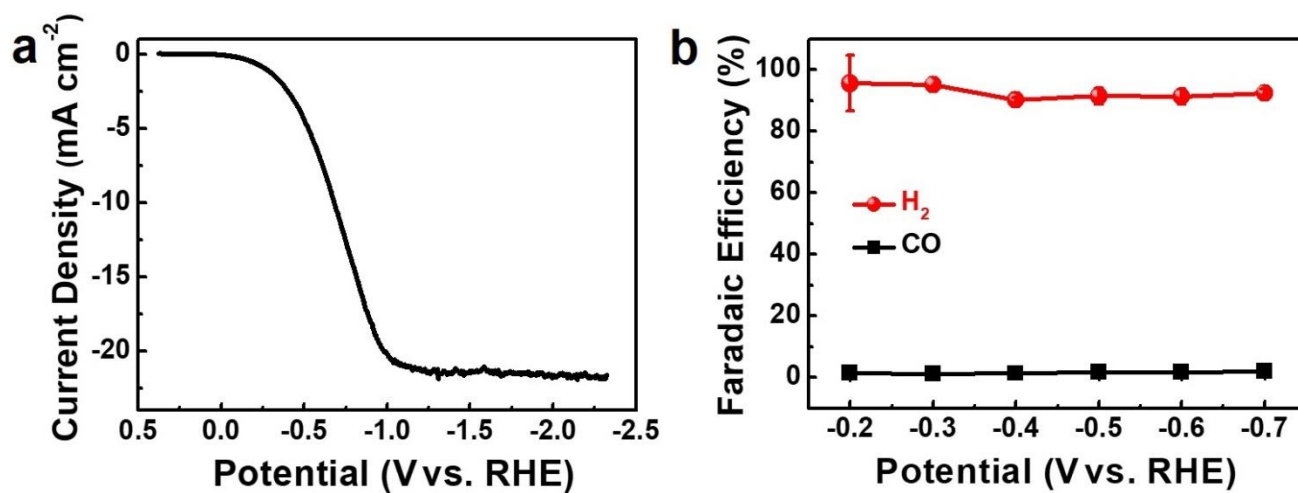

**Supplementary Figure 7.** (a) Polarization curve and (b) potential-dependent Faradaic efficiency for CO and H<sub>2</sub> on bare Si nanowire array photocathode in CO<sub>2</sub>-saturated 0.5 M KHCO<sub>3</sub> under 0.5 sun illumination.



## 2. Supplementary Table

**Supplementary Table 1.** Fitting parameters of the EXAFS spectra of Bi catalyst at different potentials.

R: distance;  $\sigma^2$ : mean-square disorder;  $E_0$ : energy shift.

|                                    | <i>Scattering path</i> | <i>CN</i>         | <i>R</i> (Å) | <i>E<sub>0</sub></i> (eV) | <i>σ<sup>2</sup></i> (Å <sup>2</sup> ) |
|------------------------------------|------------------------|-------------------|--------------|---------------------------|----------------------------------------|
| <b>Bi<sub>2</sub>O<sub>3</sub></b> | Bi-O                   | 1.0(2)            | 2.14(1)      | -0.52( <b>1.31</b> )      | 0.0011(9)                              |
|                                    | Bi-O                   | 2.0(3)            | 2.22(1)      | -0.52( <b>1.31</b> )      | 0.0096(8)                              |
|                                    | Bi-O                   | 1.0(2)            | 2.55(1)      | -0.52( <b>1.31</b> )      | 0.0209(2)                              |
|                                    | Bi-O                   | 1.0(2)            | 2.65(1)      | -0.52( <b>1.31</b> )      | 0.0202(5)                              |
|                                    | Bi-Bi                  | 2.0(3)            | 3.60(1)      | -0.52( <b>1.31</b> )      | 0.0048(6)                              |
| <b>Bi</b>                          | Bi-Bi                  | 3.0(4)            | 3.07(1)      | -0.94( <b>0.92</b> )      | 0.0057(9)                              |
|                                    | Bi-Bi                  | 3.0(4)            | 3.53(2)      | -0.94( <b>0.92</b> )      | 0.0189(9)                              |
|                                    | Bi-Bi                  | 6.0(8)            | 4.54(4)      | -0.94( <b>0.92</b> )      | 0.0208(9)                              |
|                                    | Bi-Bi                  | 6.0(8)            | 4.74(5)      | -0.94( <b>0.92</b> )      | 0.0219(7)                              |
| <b>OCV</b>                         | Bi-O                   | 2.3(8)            | 2.27(4)      | 2.17( <b>3.07</b> )       | 0.0045(3)                              |
|                                    | Bi-O                   | 1.2(4)            | 2.60(4)      | 2.17( <b>3.07</b> )       | 0.0122(6)                              |
| <b>At -0.24 V</b>                  | Bi-O                   | 1.1(3)            | 1.96(3)      | -15.00( <b>8.75</b> )     | 0.0007(4)                              |
|                                    | Bi-O                   | 2.3(6)            | 2.19(4)      | -15.00( <b>8.75</b> )     | 0.0062(6)                              |
|                                    | Bi-O                   | 0.9(6)            | 2.91(9)      | 2.89( <b>3.86</b> )       | 0.0055(3)                              |
|                                    | Bi-O                   | 0.9(6)            | 2.67(4)      | 2.89( <b>3.86</b> )       | 0.0012(3)                              |
|                                    | Bi-Bi                  | 2.6( <b>1.8</b> ) | 3.09(3)      | 2.89( <b>3.86</b> )       | 0.0079(1)                              |
| <b>At -0.78 V</b>                  | Bi-O                   | 0.5(1)            | 2.59(2)      | 2.33( <b>1.84</b> )       | 0.0008(7)                              |
|                                    | Bi-C                   | 0.5(1)            | 3.02(5)      | 2.33( <b>1.84</b> )       | 0.0008(7)                              |
|                                    | Bi-Bi                  | 1.6(3)            | 3.10(2)      | 2.33( <b>1.84</b> )       | 0.0048(5)                              |

The numbers in bracket are the last digit errors expect the red marked ones (full error).

**Supplementary Table 2.** Zero-point energy correction ( $E_{\text{ZPE}}$ ), entropy contribution ( $TS$ ), and the total free energy correction ( $G-E_{\text{elec}}$ ) for the studied system.

| <b>Species</b>        | <b><math>E_{\text{ZPE}}</math> (eV)</b> | <b><math>-TS</math> (eV)</b> | <b><math>G-E_{\text{elec}}</math> (eV)</b> |
|-----------------------|-----------------------------------------|------------------------------|--------------------------------------------|
| <b>H<sub>2</sub></b>  | 0.27                                    | -0.41                        | -0.14                                      |
| <b>H<sub>2</sub>O</b> | 0.56                                    | -0.67                        | -0.11                                      |
| <b>CO<sub>2</sub></b> | 0.30                                    | -0.67                        | -0.37                                      |
| <b>HCOOH</b>          | 0.89                                    | -0.89                        | 0.00                                       |
| <b>CO</b>             | 0.13                                    | -0.61                        | -0.48                                      |
| <b>H*</b>             | 0.13                                    | 0.03                         | 0.10                                       |
| <b>COOH*</b>          | 0.59                                    | -0.26                        | 0.33                                       |
| <b>OCHO*</b>          | 0.57                                    | -0.31                        | 0.26                                       |

### 3. Supplementary Note 1

The micro-kinetic modeling method utilized here for the formate partial current density calculation is based on the assumption that CO<sub>2</sub> adsorption, CO<sub>2</sub> protonation, \*OCHO protonation and \*HCOOH desorption are the main steps involved. The reactions can be expressed using the following steps:

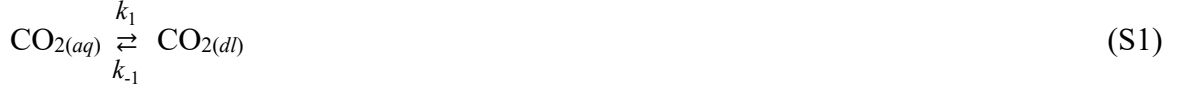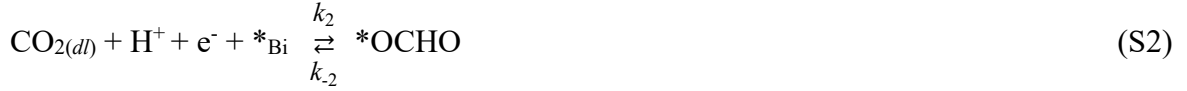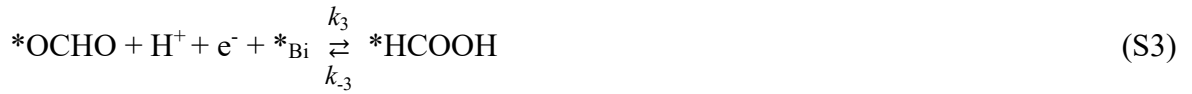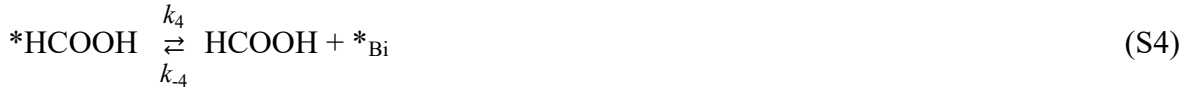

where \*<sub>Bi</sub> represents the adsorption site, and CO<sub>2(aq)</sub> and CO<sub>2(dl)</sub> represent CO<sub>2</sub> in the electrolyte and the catalyst-electrolyte interface, respectively. Based on the above reduction steps, the rate equations of each species can be written as:

$$\frac{\partial x_{\text{CO}_2(dl)}}{\partial t} = k_1 x_{\text{CO}_2(aq)} - k_{-1} x_{\text{CO}_2(dl)} - k_2 x_{\text{CO}_2(dl)} \theta_{*_{\text{Bi}}} + k_{-2} \theta_{*_{\text{OCHO}}} \quad (\text{S5})$$

$$\frac{\partial \theta_{*_{\text{OCHO}}}}{\partial t} = k_2 x_{\text{CO}_2(dl)} \theta_{*_{\text{Bi}}} - k_{-2} \theta_{*_{\text{OCHO}}} - k_3 \theta_{*_{\text{OCHO}}} \theta_{*_{\text{Bi}}} + k_{-3} \theta_{*_{\text{HCOOH}}} \quad (\text{S6})$$

These rate equations are solved numerically under steady state with the constraint from site conservation. For electrochemical step *i*, its equilibrium constant (*K<sub>i</sub>*) can be expressed as:

$$K_i = A_i \exp\left(\frac{\Delta G_i}{k_B T}\right) \quad (\text{S7})$$

where Δ*G<sub>i</sub>* is the free energy change of step *i*, and *k<sub>B</sub>* is the Boltzmann constant. For non-electrochemical step *i*, the rate constant (*k<sub>i</sub>*) is given by:

$$k_i = \nu \exp\left(-\frac{\Delta E_b}{k_B T}\right) \quad (\text{S8})$$

*E<sub>b</sub>* is the HCOOH adsorption energy. In our work, we adopted the reported pre-exponential factors for both electrochemical steps (*A<sub>i</sub>* = 3.6 × 10<sup>4</sup> s<sup>-1</sup>) and non-electrochemical step (*ν* = 10<sup>13</sup> s<sup>-1</sup>), which were derived from the fitting of experimental data of Au surface by Nørskov *et al.* (*J. Phys. Chem. Lett.* **4**,

388–392(2013)). While for electrochemical step,  $K_i$  is associated with the reaction potential ( $U$  vs. RHE), given by:

$$K_i = \exp\left(-\frac{e(U - U_i)}{k_B T}\right) \quad (\text{S9})$$

where  $U_i$  is the reversible potential of step  $i$  deduced by  $U_i = -\Delta G_i/e$ . And the  $k_i$  is written as:

$$A_i \exp\left(-\frac{E_{a,i}}{k_B T}\right) \exp\left(-\frac{e\beta_i(U - U_i)}{k_B T}\right) \quad (\text{S10})$$
